# Supplementary material
Source: publisher figshare collection journal article supplement (https://acs.figshare.com/ndownloader/files/4123831)
Supplement: Supplementary file 1 [file 4123831]

**Supporting Information For:**

**Designing Efficient Localized Surface Plasmon  
Resonance-Based Sensing Platforms: Optimization of  
Sensor Response by Controlling the Edge Length of  
Gold Nanoprisms**

Gayatri K. Joshi,<sup>†</sup> Phillip J. McClory,<sup>†</sup> Barry B. Muhoberac,<sup>†</sup> Amar Kumbhar,<sup>#</sup> Kimberly  
A. Smith,<sup>†</sup> and Rajesh Sardar<sup>†\*</sup>

<sup>†</sup>Department of Chemistry and Chemical Biology, Indiana University Purdue University  
Indianapolis, 402 N. Blackford Street, Indianapolis, IN 46202, USA. <sup>#</sup>Chapel Hill  
Analytical and Nanofabrication Laboratory, University of North Carolina, Chapel Hill,  
NC 27599, USA.

E-mail: [rsardar@iupui.edu](mailto:rsardar@iupui.edu)

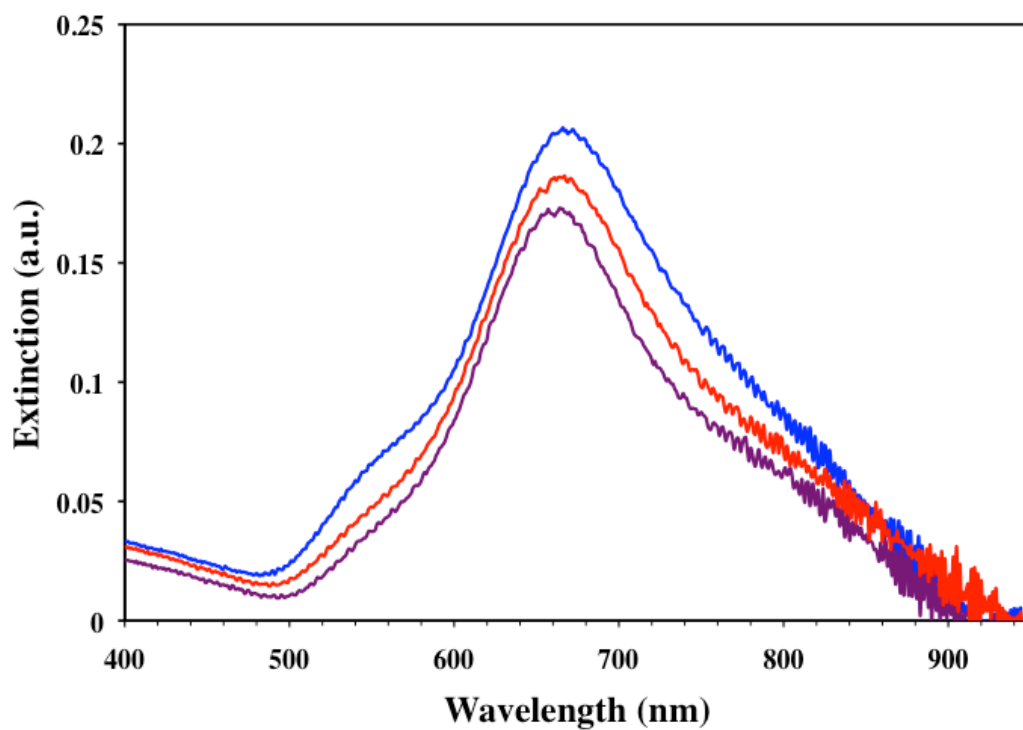

**SI-Figure 1.** The effect of tape cleaning on the UV-visible spectrum of supporting-substrate-bound nanoprisms. Ensemble extinction spectra before tape cleaning (blue,  $\lambda_{\text{LSPR}}$ : 673 nm), after tape cleaning (red,  $\lambda_{\text{LSPR}}$ : 673 nm), and after tape cleaning followed by washing with CH<sub>2</sub>Cl<sub>2</sub> (purple,  $\lambda_{\text{LSPR}}$ : 671 nm).

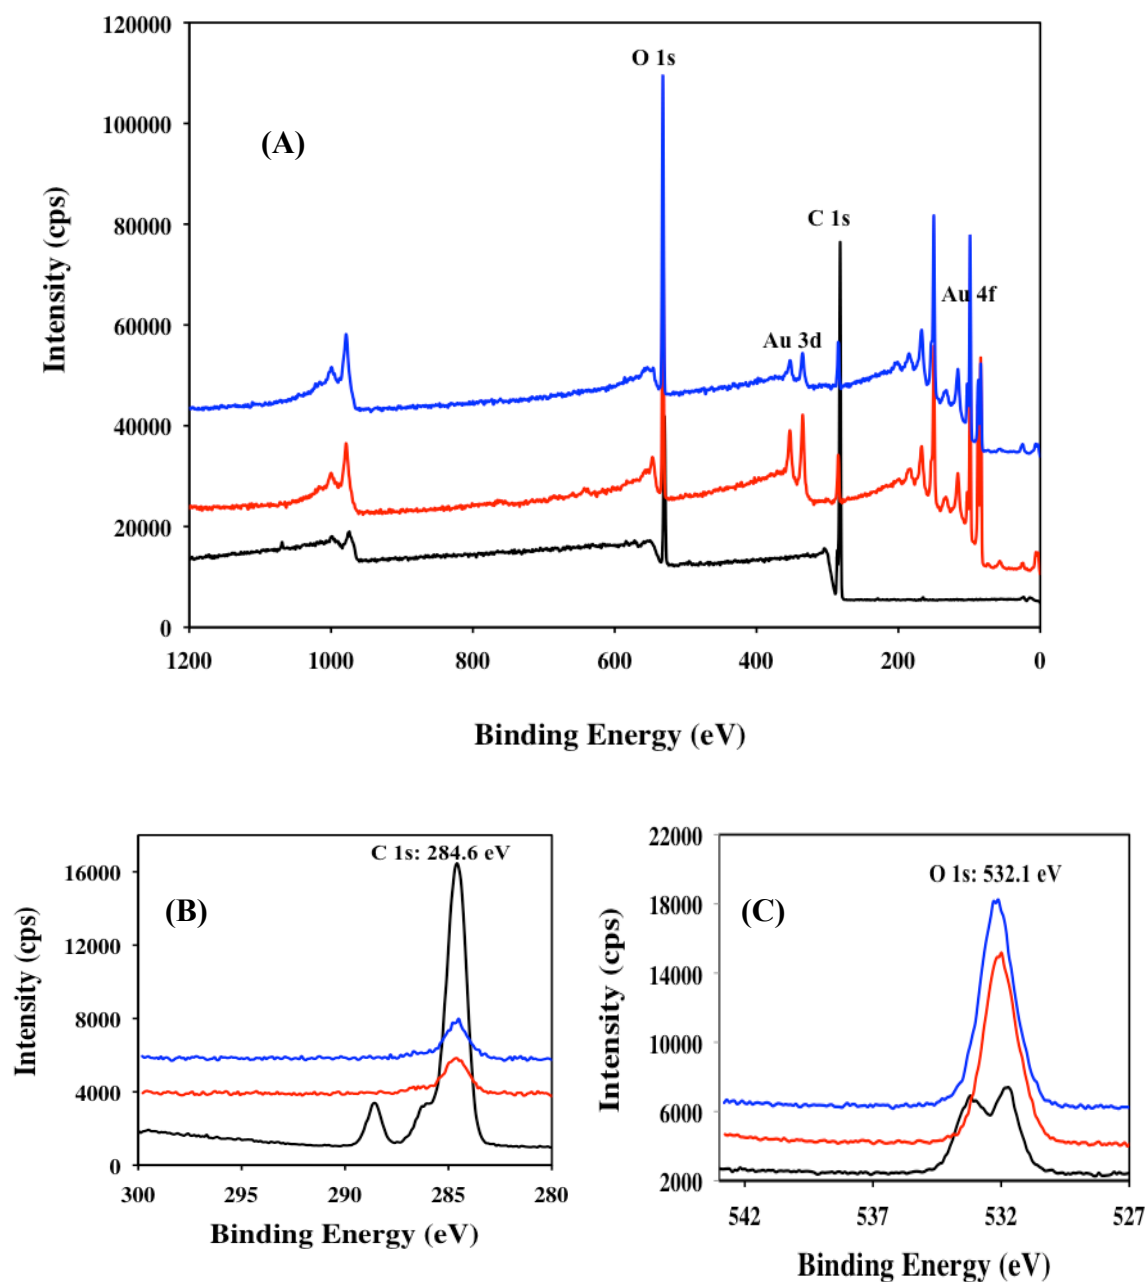

**SI-Figure 2.** The effect of tape cleaning on the XPS spectrum of supporting substrate-bound nanoprisms. (A) Survey scan showing spectrum of nanoprism before (red) and after (blue) tape cleaning and CH<sub>2</sub>Cl<sub>2</sub> wash, and of tape alone (black). Expansion of the carbon 1s (B) and oxygen 1s (C) signals.

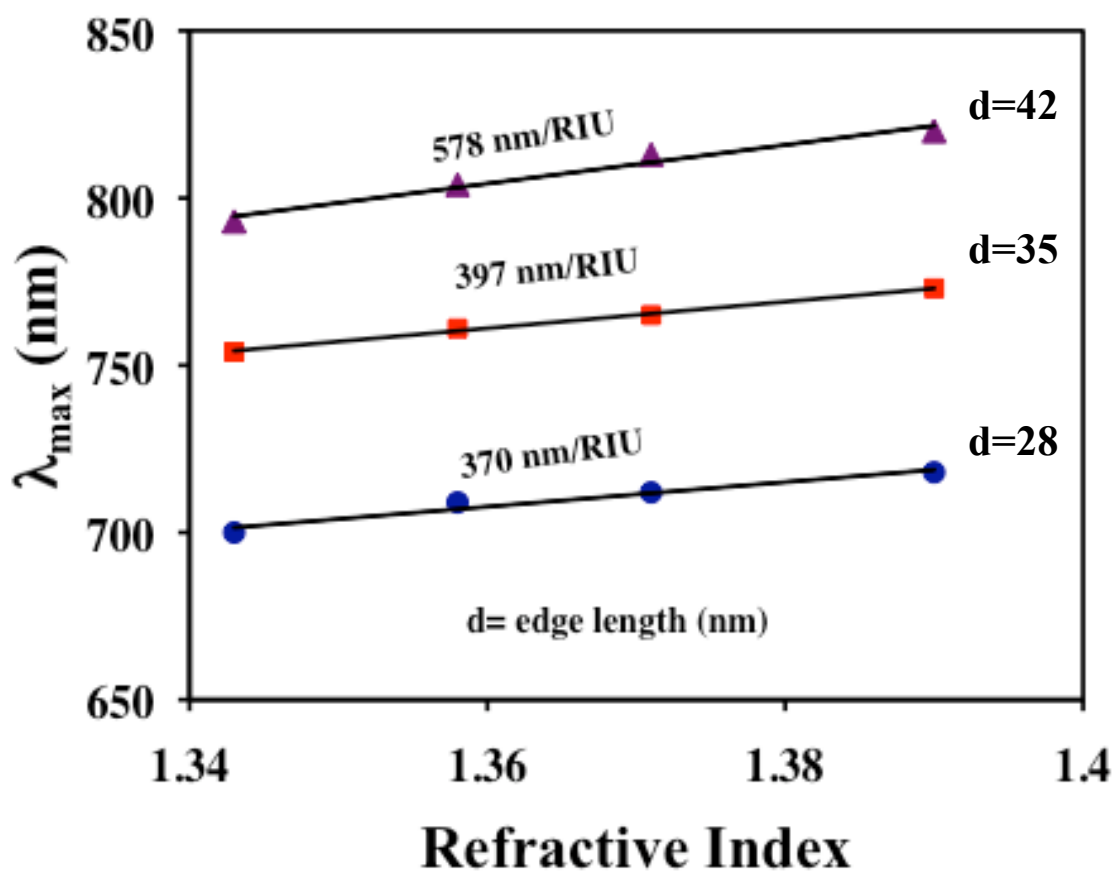

**SI-Figure 3.** The relationship between LSPR dipole peak position of the nanoprisms of different edge length in solution and refractive index of the bulk solutions.

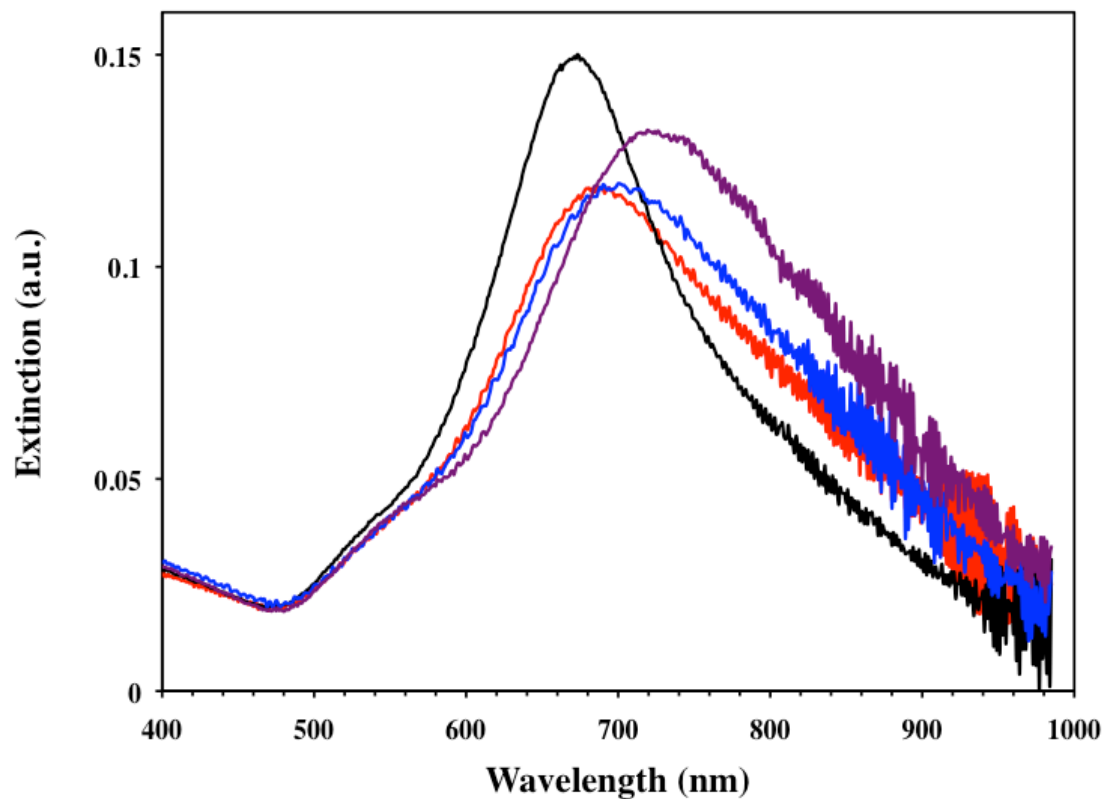

**SI-Figure 4.** Functionalization steps of supporting substrate-bound nanoprisms followed by UV-visible spectroscopic analyses. Ensemble extinction spectra recorded before nanoprism functionalization (black,  $\lambda_{\text{LSPR}}$ : 677 nm), after modification with mixed thiols (red,  $\lambda_{\text{LSPR}}$ : 695 nm), after attachment of biotin via amide coupling (blue,  $\lambda_{\text{LSPR}}$ : 704 nm), and after incubation with 1.0  $\mu\text{M}$  SA (purple,  $\lambda_{\text{LSPR}}$ : 734 nm).
